# Supplementary material
Source: publisher figshare collection journal article supplement (https://diabetesjournals.figshare.com/ndownloader/files/39307466)
Supplement: Supplementary file 1 [file 39307466]

## SUPPLEMENTARY MATERIAL

### Biomarker Changes Associated with both Dulaglutide and Cardiovascular Events in the REWIND Randomized Controlled Trial: A Nested Case-Control *post hoc* Analysis

#### Contents

|                                                                                                                                                                                                                | Page |
|----------------------------------------------------------------------------------------------------------------------------------------------------------------------------------------------------------------|------|
| <b>Supplemental Description of Metabolite Assay Methods</b>                                                                                                                                                    | 2    |
| <b>Table S1:</b> List of Measured Proteins and the Assay Systems Used for Analyses                                                                                                                             | 3    |
| <b>Table S2:</b> Coefficient of Variance (CV) and Lower Limit of Detection of Protein Biomarker Assays                                                                                                         | 4    |
| <b>Table S3:</b> List of Metabolite Biomarkers in the Analysis                                                                                                                                                 | 5    |
| <b>Table S4:</b> Adjusted Effect of Dulaglutide on the 2-Year Change in Protein Levels                                                                                                                         | 7    |
| <b>Table S5:</b> Sensitivity Analysis: Association Between MACE Status and Change in Specific Biomarker Levels from Baseline, After Excluding Cases that Occurred Before the 2-Year Visit (and their Controls) | 8    |
| <b>Table S6:</b> Adjusted Effect of Dulaglutide on the 2-Year Change in Metabolite Levels                                                                                                                      | 9    |

## Supplemental Description of Metabolite Assay Methods

Targeted metabolomics was performed on plasma samples collected after 2 years from patient enrollment. Plasma samples were frozen immediately after collection and thawed prior to analysis. Metabolomics data were acquired using a targeted liquid chromatography-mass spectrometry approach. Data were acquired using a Shimadzu Nexera X2 UHPLC system coupled to an AB SCIEX 6500+ triple quadrupole mass spectrometer equipped with an electrospray source. Two chromatographic methods were applied: one using a Waters Acquity BEH Amide 15 mm  $\times$  2.1 mm, 3.5  $\mu$ m particle size, column (assay A), and another using a Waters XSelect HSS T3 C18 15 mm  $\times$  2.1 mm, 3.5  $\mu$ m particle size, column (assay B). Both columns were maintained at +40°C. Elution solvents for both methods were 10 mM ammonium formate adjusted with 0.1% formic acid (solvent A) and 0.1% formic acid in acetonitrile (solvent B) and run under gradient conditions. Data were acquired using scheduled multiple reaction monitoring (MRM) mode with polarity switching. A total of 250 polar metabolites were targeted. For most of the metabolites, identification was supported by one qualifier ion monitored in addition to a quantifier ion. To resolve interferences amongst specific metabolites, two qualifier ions were monitored (data not reported). Two extraction protocols were used for assay A and B, respectively. Frozen plasma samples were thawed in an ice bath. For assay A, 150  $\mu$ L of pre-chilled acetonitrile-methanol (1:1 v/v) solvent mixture was added to 25- $\mu$ L plasma aliquot. For assay B, 150  $\mu$ L of pre-chilled methanol-water (4:1 v/v) solvent mixture was added to a second 25- $\mu$ L plasma aliquot. Samples were mixed thoroughly and incubated at -20°C overnight. Both extraction solutions were spiked with a mix of stable labeled internal standards. The samples were then centrifuged for 15 min at 14000 g at +4°C, and the supernatants were removed for LC-MS/MS analysis. For each assay, a pooled calibrator sample was created for each method by combining an aliquot of the same volume from all the extracted samples together. The pooled calibrator (100% calibration point) was serially diluted in the same extraction solvent and used to create a calibration curve (75%, 60%, 40%, 25%, 10%) for relative quantitation and batch-to-batch data normalization. A pooled QC sample was also prepared at 50% (1:1 v/v dilution). Individual samples were further diluted 1:1 (v/v) with extraction solution, transferred into a 96-well plate and injected for LC-MS/MS analysis. Only analytes detected at the lowest pooled calibrator with signal-to-noise > 3 and detected in more than 75% of the individual samples were quantified. Relative quantitation to the pooled calibrators was achieved using a log-log linear regression model. Relative values extrapolated outside the calibration curve were not imputed. Peak areas were integrated using the AB SCIEX MultiQuant 3.0.2 software. Metabolite areas were normalized to matched internal standard area responses. For analytes with no matching stable labeled internal standards, the optimal match (picked amongst the internal standards monitored under the same polarity and within the same assay) was the one giving the minimum relative standard deviation of the pooled calibrator responses and best linearity fit. For statistical analysis metabolites showing coefficient of variations (CV%) below 20% for the qualifier-to-quantifier MRM ratio, as well as linear regression coefficients (R<sup>2</sup>) above 0.85 were reported.

| <b>Table S1: List of Measured Proteins and the Assay Systems Used for Analyses</b> |                                        |
|------------------------------------------------------------------------------------|----------------------------------------|
| <b>Protein Biomarker</b>                                                           | <b>Assay System</b>                    |
| High sensitivity C-reactive Protein                                                | Roche Cobas                            |
| Growth Differentiation Factor 15                                                   | R&D Systems ELISA                      |
| C-Peptide                                                                          | Roche Cobas                            |
| NT-proBNP                                                                          | MSD V-plex                             |
| Intact Proinsulin                                                                  | Invitron ELISA                         |
| Insulin like growth factor binding protein 2                                       | R&D Systems ELISA                      |
| Serum amyloid A                                                                    | MSD V-plex Vascular Inflammation panel |
| Apolipoprotein B                                                                   | Roche Cobas                            |
| Apolipoprotein CIII                                                                | Roche Cobas                            |
| Interleukin 6                                                                      | MSD V-plex proinflammatory panel       |
| Cytokeratin 18                                                                     | Diapharma ELISA                        |
| Interferon gamma                                                                   | MSD V-plex proinflammatory panel       |
| Soluble intercellular adhesion molecule 1                                          | MSD V-plex Vascular Inflammation panel |
| Soluble vascular cell adhesion molecule 1                                          | MSD V-plex Vascular Inflammation panel |
| Interleukin 8                                                                      | MSD V-plex proinflammatory panel       |
| Interleukin 10                                                                     | MSD V-plex proinflammatory panel       |
| Apolipoprotein AI                                                                  | Roche Cobas                            |
| Insulin                                                                            | In house ELISA                         |
| Tumor necrosis factor alpha                                                        | MSD V-plex proinflammatory panel       |

**Table S2: Coefficient of Variance (CV) and Lower Limit of Detection of Protein Biomarker Assays**

| <b>Protein Biomarker</b>                     | <b>Lower Limit of Detection</b> | <b>Intra-assay %CV</b> | <b>Inter-assay %CV</b>                        |
|----------------------------------------------|---------------------------------|------------------------|-----------------------------------------------|
| High sensitivity C-reactive Protein          | 0.15 mg/L                       | single sample analysis | <3 SD of Roche clinical-grade quality control |
| Growth Differentiation Factor 15             | 8.95 pg/mL                      | 2.7%                   | 10.4%                                         |
| C-Peptide                                    | 0.01 ng/mL                      | single sample analysis | <3 SD of Roche clinical-grade quality control |
| NT-proBNP                                    | 1.52 pg/mL                      | 6.0%                   | 6.4%                                          |
| Intact Proinsulin                            | 3.6 pmol/L                      | 18%                    | 13%                                           |
| Insulin like growth factor binding protein 2 | 14.3 ng/mL                      | 8.0%                   | 5.9%                                          |
| Serum amyloid A                              | 0.97 ng/mL                      | 6.1%                   | 11.3%                                         |
| Apolipoprotein B                             | 3 mg/dL                         | single sample analysis | <3 SD of Roche clinical-grade quality control |
| Apolipoprotein CIII                          | 3 mg/dL                         | single sample analysis | <3 SD of Roche clinical-grade quality control |
| Cytokeratin 18                               | 65.1 U/L                        | 11.6%                  | 13%                                           |
| Interferon gamma                             | 0.06 pg/mL                      | 3.7%                   | 3.6%                                          |
| Interleukin 6                                | 0.005 pg/mL                     | 4.6%                   | 5.9%                                          |
| Soluble intercellular adhesion molecule 1    | 0.15 ng/mL                      | 5.9%                   | 5.3%                                          |
| Soluble vascular cell adhesion molecule 1    | 0.65 ng/mL                      | 4%                     | 2.1%                                          |
| Interleukin 8                                | 0.01 pg/mL                      | 4.5%                   | 7.8%                                          |
| Interleukin 10                               | 0.01 pg/mL                      | 9.96%                  | 10.1%                                         |
| Apolipoprotein AI                            | 3 mg/dL                         | single sample analysis | <3 SD of Roche clinical-grade quality control |
| Insulin                                      | 6.1 pg/mL                       | 6.3%                   | 8.9%                                          |
| Tumor necrosis factor alpha                  | 0.05 pg/mL                      | 4.2%                   | 6.3%                                          |

SD – standard deviation

**Table S3: List of Metabolite Biomarkers in the Analysis**

|                                |                               |                               |
|--------------------------------|-------------------------------|-------------------------------|
| 2-hydroxybutyric acid          | Arginine                      | Beta-alanine                  |
| Threonine                      | Octanoylcarnitine             | Hydroxyoctenoylcarnitine      |
| 3-hydroxybutyric acid          | Hydroxytetradecenoylcarnitine | Arachidonoylcarnitine         |
| Asparagine                     | Octenoylcarnitine             | N-acetylaspatic acid          |
| Guanidinoacetic acid           | Tetradecenoylcarnitine        | Isoleucine                    |
| Citrulline                     | N-acetylthreonine             | Malic acid                    |
| Free carnitine                 | Tryptophan                    | Glutaric acid                 |
| Hydroxydecanoylcarnitine       | Creatinine                    | Proline                       |
| Glutamine                      | Acetylcarnitine               | Phenylpyruvic acid            |
| Creatine                       | Serine                        | Kynurenine                    |
| Uridine monophosphate          | Palmitoleoylcarnitine         | Allantoin                     |
| Glycine                        | Nicotinamide                  | Decadienoylcarnitine          |
| 3-hydroxyisobutyric acid       | N-acetylmethionine            | 2,3-pyridinedicarboxylic acid |
| 3-phenyllactic acid            | Octadecanoylcarnitine         | Taurine                       |
| CMPF <sup>1</sup>              | Linoleoylcarnitine            | N-acetylserine                |
| 2-hydroxy-3-methylbutyric acid | Xanthurenic acid              | Lysine                        |
| Hydroxydodecenoylcarnitine     | Decanoylcarnitine             | Sarcosine                     |
| Tyrosine                       | 1-methyladenosine             | S-adenosylhomocysteine        |
| Butenoylcarnitine              | Decatrienoylcarnitine         | Glutamic acid                 |
| Dodecenoylcarnitine            | Arachidoylecarnitine          | N-acetyltryptophan            |
| Ketoleucine                    | Urea                          | N-acetylalanine               |
| Alpha-ketoisovaleric acid      | Succinic acid                 | 2-aminoadipic acid            |
| Asymmetric dimethylarginine    | N-alpha-acetyllysine          | Pantothenic acid              |
| Uridine                        | Palmitoylcarnitine            | Citric acid                   |
| Leucine                        | 3-aminoisobutyric acid        | Uric acid                     |
| Decenoylcarnitine              | Heptanoylcarnitine            | Isovalerylcarnitine           |
| Ornithine                      | Methionine sulfoxide          | Hypoxanthine                  |
| tetradecadienoylcarnitine      | Betaine                       | Trans aconitic acid           |
| 2-aminobutyric acid            | Myristoylcarnitine            | C6:2 carnitine                |
| Eicoseneoylcarnitine           | N-acetylputrescine            | Riboflavin                    |
| Lactic acid                    | 3-methyl-2-oxovaleric acid    | Propionylcarnitine            |
| Trimethylamine-N-oxide         | 1-methylnicotinamide          | Aspartic acid                 |
| N –alpha acetyl-L-arginine     | N, N-dimethylglycine          | Symmetric dimethylarginine    |
| Hydroxyproline                 | Butyrylcarnitine              | Inosine                       |
| Cholesterol sulfate            | 4-pyridoxic acid              | Alanine                       |
| Pyroglutamic acid              | Phenylalanine                 | 1-methylhistidine             |
| N-2-furoylglycine              | 2-hydroxyisocaproic acid      | S-methylcysteine sulfoxide    |
| N-acetylglutamic acid          | C18:3 carnitine               | Isocitric acid                |
| Imidazole-4-acetic acid        | Xanthine                      | Alpha-ketoglutaric acid       |
| Cystine                        | Mevalonic acid                | 3-methylhistidine             |
| Valine                         | Kynurenic acid                | Histidine                     |

|                          |                               |                   |
|--------------------------|-------------------------------|-------------------|
| Oleoylecarnitine         | 4-oxoproline_pipicolinic acid | Guanosine         |
| Hexadecadienylecarnitine | N-epsilon-acetyllysine        | Ethanolamine      |
| N-acetylcitrulline       | 2,3-dihydroxybenzoic acid     | S-methylcysteine  |
| Homocitrulline           | Dodecanylecarnitine           | N-acetylorcithine |

---

<sup>1</sup>CMPF - carboxy-4-methyl-5-propyl-2-furanpropanoic acid

**Table S4: Association of Dulaglutide with the 2-Year Change in Protein Levels**

| <b>Protein Biomarker</b>                     | <b>Beta Estimate (95%CI) for Dulaglutide</b> | <b>P*</b> |
|----------------------------------------------|----------------------------------------------|-----------|
| High sensitivity C-reactive Protein          | -0.203 (-0.297, -0.110)                      | 0.000020* |
| Growth Differentiation Factor 15             | -0.079 (-0.112, -0.045)                      | 0.000006* |
| C-Peptide                                    | 0.135 (0.070, 0.200)                         | 0.000050* |
| NT-proBNP                                    | -0.145 (-0.229, -0.060)                      | 0.000845* |
| Intact Proinsulin                            | -0.094 (-0.156, -0.031)                      | 0.003511  |
| Insulin like growth factor binding protein 2 | 0.049 (0.014, 0.084)                         | 0.005720  |
| Serum amyloid A                              | -0.131 (-0.236, -0.026)                      | 0.014509  |
| Apolipoprotein B                             | -0.022 (-0.043, 0.000)                       | 0.051646  |
| Apolipoprotein CIII                          | -0.047 (-0.100, 0.006)                       | 0.083511  |
| Cytokeratin 18                               | -0.046 (-0.100, 0.009)                       | 0.103077  |
| Interferon gamma                             | 0.017 (-0.058, 0.093)                        | 0.169657  |
| Interleukin 6                                | -0.039 (-0.100, 0.022)                       | 0.211904  |
| Soluble intercellular adhesion molecule 1    | -0.024 (-0.064, 0.015)                       | 0.231563  |
| Soluble vascular cell adhesion molecule 1    | -0.024 (-0.065, 0.016)                       | 0.231781  |
| Interleukin 8                                | 0.038 (-0.025, 0.101)                        | 0.239601  |
| Interleukin 10                               | 0.036 (-0.032, 0.103)                        | 0.304340  |
| Apolipoprotein AI                            | 0.003 (-0.009, 0.015)                        | 0.576137  |
| Insulin                                      | -0.014 (-0.078, 0.050)                       | 0.662862  |
| Tumor necrosis factor alpha                  | -0.004 (-0.040, 0.032)                       | 0.836807  |

The effect of dulaglutide on the 2-year difference of the natural logarithm (ln) levels of each protein (calculated as ln (2-year/baseline) adjusted for ln (baseline biomarker level), age, sex, white identification, systolic blood pressure, previous cardiovascular disease, current smoking, body mass index, HbA1c, eGFR, LDL cholesterol, and albuminuria is shown. The biomarkers are sorted from the lowest to highest P values for the beta coefficient, and negative values denote a greater fall in level from baseline to 2 years with dulaglutide versus placebo. \*P values that are significant at a level of 0.05/19 = 0.0026.

**Table S5: Sensitivity Analysis: Association Between MACE Status and Change in Specific Biomarker Levels from Baseline, After Excluding Cases that Occurred Before the 2-Year Visit (and their Controls)**

|             |                       | Adjusted for Dulaglutide and Risk Factors<br>OR per Unit Higher Level (95%CI) | P     |
|-------------|-----------------------|-------------------------------------------------------------------------------|-------|
| Proteins    | High sensitivity CRP  | 1.207 (1.069, 1.362)                                                          | 0.002 |
|             | NT-proBNP             | 1.128 (0.980, 1.297)                                                          | 0.094 |
|             | GDF15                 | 1.709 (1.208, 2.418)                                                          | 0.002 |
|             | C-peptide             | 1.162 (0.984, 1.371)                                                          | 0.076 |
| Metabolites | 2-hydroxybutyric Acid | 1.146 (0.812, 1.619)                                                          | 0.439 |
|             | Threonine             | 1.018 (0.511, 2.026)                                                          | 0.960 |

OR – odds ratio; CI – confidence interval; The relationship between a 1-unit higher Ln(2-year) – Ln (baseline) is shown. Risk factors included in the model were age, sex, white self-identification, systolic blood pressure, previous cardiovascular disease, current smoking, body mass index, HbA1c, the estimated glomerular filtration rate (eGFR), LDL cholesterol, and albuminuria and (for the dulaglutide model) and the interaction of dulaglutide and the change in biomarker. The significance threshold for proteins is 0.05/4=0.0125.



**Table S6: Association of Dulaglutide with the 2-Year Change in Metabolite Levels**

| <b>Metabolite Biomarker</b>    | <b>Beta Estimate (95%CI) for Dulaglutide</b> | <b>P*</b> |
|--------------------------------|----------------------------------------------|-----------|
| 2-hydroxybutyric acid          | -0.100 (-0.148, -0.053)                      | 0.000041* |
| Threonine                      | 0.044 (0.021, 0.068)                         | 0.000266* |
| 3-hydroxybutyric acid          | -0.150 (-0.237, -0.063)                      | 0.000769  |
| Asparagine                     | 0.030 (0.012, 0.047)                         | 0.000796  |
| Guanidinoacetic acid           | 0.054 (0.021, 0.087)                         | 0.001581  |
| Citrulline                     | 0.070 (0.026, 0.115)                         | 0.001892  |
| Free carnitine                 | 0.033 (0.012, 0.054)                         | 0.002175  |
| Hydroxydecanoylcarnitine       | -0.070 (-0.118, -0.023)                      | 0.003709  |
| Glutamine                      | 0.023 (0.006, 0.039)                         | 0.006757  |
| Creatine                       | 0.057 (0.016, 0.099)                         | 0.006885  |
| Uridine monophosphate          | 0.027 (0.007, 0.048)                         | 0.01014   |
| Glycine                        | 0.033 (0.007, 0.058)                         | 0.011068  |
| 3-hydroxyisobutyric acid       | -0.049 (-0.086, -0.011)                      | 0.011594  |
| 3-phenyllactic acid            | 0.061 (0.014, 0.109)                         | 0.011765  |
| CMPF <sup>1</sup>              | -0.137 (-0.245, -0.03)                       | 0.012445  |
| 2-hydroxy-3-methylbutyric acid | -0.058 (-0.105, -0.011)                      | 0.015344  |
| Hydroxydodecenoylcarnitine     | -0.075 (-0.137, -0.013)                      | 0.017916  |
| Tyrosine                       | 0.024 (0.004, 0.045)                         | 0.020921  |
| Butenoylcarnitine              | -0.055 (-0.102, -0.008)                      | 0.022623  |
| Dodecenoylcarnitine            | -0.059 (-0.11, -0.007)                       | 0.025315  |
| Ketoleucine                    | -0.03 (-0.057, -0.003)                       | 0.02826   |
| Alpha-ketoisovaleric acid      | -0.03 (-0.056, -0.003)                       | 0.028751  |
| Asymmetric dimethylarginine    | 0.018 (0.002, 0.035)                         | 0.030252  |
| Uridine                        | -0.035 (-0.068, -0.003)                      | 0.034513  |
| Leucine                        | -0.023 (-0.046, -0.001)                      | 0.041282  |
| Decenoylcarnitine              | -0.046 (-0.09, -0.002)                       | 0.041838  |
| Ornithine                      | 0.037 (0.001, 0.072)                         | 0.04386   |
| tetradecadienoylcarnitine      | -0.053 (-0.105, 0)                           | 0.049448  |
| 2-aminobutyric acid            | -0.037 (-0.073, 0)                           | 0.049939  |
| Eicoseneoylcarnitine           | -0.036 (-0.073, 0)                           | 0.05045   |
| Lactic acid                    | -0.037 (-0.075, 0)                           | 0.050511  |
| Trimethylamine-N-oxide         | -0.083 (-0.166, 0.001)                       | 0.05328   |
| N –alpha acetyl-L-arginine     | 0.031 (-0.001, 0.062)                        | 0.055828  |
| Hydroxyproline                 | 0.062 (-0.002, 0.125)                        | 0.058796  |
| Cholesterol sulfate            | -0.04 (-0.081, 0.002)                        | 0.060322  |
| Pyroglutamic acid              | 0.021 (-0.002, 0.045)                        | 0.070856  |
| N-2-furoylglycine              | 0.121 (-0.014, 0.257)                        | 0.079555  |
| N-acetylglutamic acid          | 0.03 (-0.004, 0.065)                         | 0.083373  |
| Imidazole-4-acetic acid        | 0.036 (-0.005, 0.078)                        | 0.088661  |
| Cystine                        | -0.05 (-0.108, 0.008)                        | 0.092408  |

|                               |                        |          |
|-------------------------------|------------------------|----------|
| Valine                        | -0.016 (-0.035, 0.003) | 0.093601 |
| Oleoylcarnitine               | -0.028 (-0.062, 0.005) | 0.095826 |
| Hexadecadienoylcarnitine      | -0.04 (-0.087, 0.008)  | 0.101163 |
| N-acetylcitrulline            | 0.031 (-0.007, 0.069)  | 0.109125 |
| Homocitrulline                | -0.047 (-0.105, 0.011) | 0.114967 |
| Arginine                      | 0.022 (-0.006, 0.051)  | 0.125281 |
| Octanoylcarnitine             | -0.044 (-0.099, 0.012) | 0.126389 |
| Hydroxytetradecenoylcarnitine | -0.033 (-0.076, 0.01)  | 0.128735 |
| Octenoylcarnitine             | -0.041 (-0.096, 0.013) | 0.135082 |
| Tetradecenoylcarnitine        | -0.041 (-0.094, 0.013) | 0.135491 |
| N-acetylthreonine             | 0.015 (-0.005, 0.034)  | 0.139269 |
| Tryptophan                    | 0.016 (-0.005, 0.038)  | 0.141038 |
| Creatinine                    | 0.015 (-0.005, 0.035)  | 0.142657 |
| Acetylcarnitine               | -0.021 (-0.05, 0.007)  | 0.144418 |
| Serine                        | 0.014 (-0.005, 0.033)  | 0.153896 |
| Palmitoleoylcarnitine         | -0.03 (-0.071, 0.011)  | 0.15624  |
| Nicotinamide                  | -0.042 (-0.102, 0.018) | 0.170963 |
| N-acetylmethionine            | 0.015 (-0.007, 0.036)  | 0.17853  |
| Octadecanoylcarnitine         | -0.022 (-0.053, 0.01)  | 0.18037  |
| Linoleoylcarnitine            | -0.022 (-0.057, 0.012) | 0.207461 |
| Xanthurenic acid              | 0.013 (-0.008, 0.034)  | 0.22025  |
| Decanoylcarnitine             | -0.033 (-0.087, 0.021) | 0.22987  |
| 1-methyladenosine             | -0.018 (-0.048, 0.011) | 0.230374 |
| Decatrienoylcarnitine         | -0.051 (-0.135, 0.033) | 0.235701 |
| Arachidoylcarnitine           | -0.019 (-0.05, 0.013)  | 0.24208  |
| Urea                          | -0.012 (-0.033, 0.009) | 0.249459 |
| Succinic acid                 | -0.018 (-0.048, 0.013) | 0.250773 |
| N-alpha-acetyllysine          | -0.019 (-0.051, 0.013) | 0.251681 |
| Palmitoylcarnitine            | -0.016 (-0.044, 0.012) | 0.27488  |
| 3-aminoisobutyric acid        | 0.028 (-0.024, 0.08)   | 0.289111 |
| Heptanoylcarnitine            | -0.03 (-0.085, 0.025)  | 0.290565 |
| Methionine sulfoxide          | 0.018 (-0.015, 0.051)  | 0.291983 |
| Betaine                       | 0.013 (-0.012, 0.038)  | 0.299764 |
| Myristoylcarnitine            | -0.02 (-0.059, 0.018)  | 0.300856 |
| N-acetylputrescine            | -0.015 (-0.043, 0.013) | 0.305131 |
| 3-methyl-2-oxovaleric acid    | -0.014 (-0.04, 0.012)  | 0.30538  |
| 1-methylnicotinamide          | -0.035 (-0.102, 0.032) | 0.306477 |
| N,N-dimethylglycine           | 0.026 (-0.025, 0.077)  | 0.309646 |
| Butyrylcarnitine              | 0.02 (-0.019, 0.059)   | 0.314701 |
| 4-pyridoxic acid              | 0.048 (-0.05, 0.146)   | 0.334901 |
| Phenylalanine                 | 0.009 (-0.01, 0.027)   | 0.355904 |
| 2-hydroxyisocaproic acid      | -0.015 (-0.047, 0.017) | 0.360686 |

|                               |                        |          |
|-------------------------------|------------------------|----------|
| C18:3 carnitine               | -0.016 (-0.053, 0.02)  | 0.377092 |
| Xanthine                      | 0.024 (-0.03, 0.078)   | 0.380318 |
| Mevalonic acid                | 0.033 (-0.04, 0.106)   | 0.382225 |
| Kynurenic acid                | -0.019 (-0.066, 0.029) | 0.444633 |
| 4-oxoproline_pipericolic acid | -0.027 (-0.099, 0.044) | 0.451506 |
| N-epsilon-acetyllysine        | 0.007 (-0.012, 0.026)  | 0.461809 |
| 2,3-dihydroxybenzoic acid     | 0.04 (-0.075, 0.155)   | 0.491307 |
| Dodecanoylcarnitine           | -0.015 (-0.062, 0.032) | 0.521192 |
| Beta-alanine                  | -0.012 (-0.051, 0.027) | 0.551536 |
| Hydroxyoctenoylcarnitine      | 0.015 (-0.036, 0.066)  | 0.564465 |
| Arachidonoylcarnitine         | -0.012 (-0.052, 0.028) | 0.566211 |
| N-acetylaspargic acid         | 0.005 (-0.013, 0.024)  | 0.567771 |
| Isoleucine                    | -0.007 (-0.03, 0.017)  | 0.574595 |
| Malic acid                    | -0.012 (-0.056, 0.031) | 0.579001 |
| Glutaric acid                 | 0.017 (-0.045, 0.078)  | 0.60072  |
| Proline                       | 0.007 (-0.019, 0.033)  | 0.602498 |
| Phenylpyruvic acid            | 0.009 (-0.025, 0.043)  | 0.604217 |
| Kynurenine                    | 0.007 (-0.019, 0.033)  | 0.608161 |
| Allantoin                     | 0.007 (-0.021, 0.035)  | 0.610006 |
| Decadienoylcarnitine          | -0.014 (-0.067, 0.04)  | 0.619767 |
| 2,3-pyridinedicarboxylic acid | -0.012 (-0.06, 0.037)  | 0.642837 |
| Taurine                       | 0.01 (-0.033, 0.053)   | 0.661469 |
| N-acetylserine                | 0.004 (-0.015, 0.022)  | 0.699988 |
| Lysine                        | 0.006 (-0.025, 0.037)  | 0.717826 |
| Sarcosine                     | 0.01 (-0.043, 0.063)   | 0.717886 |
| S-adenosylhomocysteine        | -0.007 (-0.048, 0.033) | 0.729121 |
| Glutamic acid                 | 0.006 (-0.03, 0.042)   | 0.734843 |
| N-acetyltryptophan            | -0.005 (-0.04, 0.029)  | 0.758412 |
| N-acetylalanine               | 0.002 (-0.013, 0.018)  | 0.772915 |
| 2-aminoadipic acid            | -0.005 (-0.043, 0.032) | 0.78199  |
| Pantothenic acid              | -0.005 (-0.045, 0.035) | 0.805055 |
| Citric acid                   | -0.004 (-0.033, 0.026) | 0.816941 |
| Uric acid                     | -0.003 (-0.027, 0.021) | 0.819102 |
| Isovalerylcarnitine           | -0.006 (-0.061, 0.049) | 0.826214 |
| Hypoxanthine                  | 0.005 (-0.049, 0.06)   | 0.84559  |
| Trans aconitic acid           | 0.003 (-0.03, 0.036)   | 0.85435  |
| C6:2 carnitine                | 0.009 (-0.099, 0.117)  | 0.865483 |
| Riboflavin                    | 0.003 (-0.037, 0.044)  | 0.873936 |
| Propionylcarnitine            | -0.003 (-0.038, 0.032) | 0.879086 |
| Aspartic acid                 | 0.003 (-0.041, 0.047)  | 0.894736 |
| Symmetric dimethylarginine    | 0.001 (-0.022, 0.025)  | 0.902373 |
| Inosine                       | -0.007 (-0.132, 0.117) | 0.906531 |

|                            |                        |          |
|----------------------------|------------------------|----------|
| Alanine                    | 0.001 (-0.02, 0.023)   | 0.922676 |
| 1-methylhistidine          | -0.002 (-0.041, 0.038) | 0.932877 |
| S-methylcysteine sulfoxide | -0.003 (-0.069, 0.063) | 0.934997 |
| Isocitric acid             | -0.002 (-0.06, 0.055)  | 0.936644 |
| Alpha-ketoglutaric acid    | 0.002 (-0.047, 0.051)  | 0.943576 |
| 3-methylhistidine          | 0.005 (-0.128, 0.137)  | 0.945936 |
| Histidine                  | 0.001 (-0.024, 0.026)  | 0.951888 |
| Guanosine                  | 0.004 (-0.151, 0.16)   | 0.954978 |
| Ethanolamine               | 0 (-0.024, 0.023)      | 0.969259 |
| S-methylcysteine           | -0.001 (-0.057, 0.054) | 0.969628 |
| N-acetylmethionine         | 0 (-0.056, 0.057)      | 0.990867 |

---

The effect of dulaglutide on the 2-year difference of the natural logarithm (ln) levels of each metabolite calculated as  $\ln(2\text{-year/baseline})$  adjusted for  $\ln(\text{baseline biomarker level})$ , age, sex, white identification, systolic blood pressure, previous cardiovascular disease, current smoking, body mass index, HbA1c, eGFR, LDL cholesterol, and albuminuria is shown. The biomarkers are sorted from the lowest to highest P values for the beta coefficient; only the subset with a P value <0.05 is shown). Negative values denote a greater fall in level from baseline to 2 years with dulaglutide versus placebo. \*P values that are significant at a level of 0.05/135 = 0.00037. <sup>1</sup>CMPF - carboxy-4-methyl-5-propyl-2-furanpropanoic acid
